# Supplementary material for: Using aquaplanets to understand the robust responses of comprehensive climate models to forcing
Source: Springer Nature journal article supplement (doi:10.1007/s00382-014-2138-0), 2014-05-03
Supplement: MOESM1 [file 382_2014_2138_MOESM1_ESM.pdf]

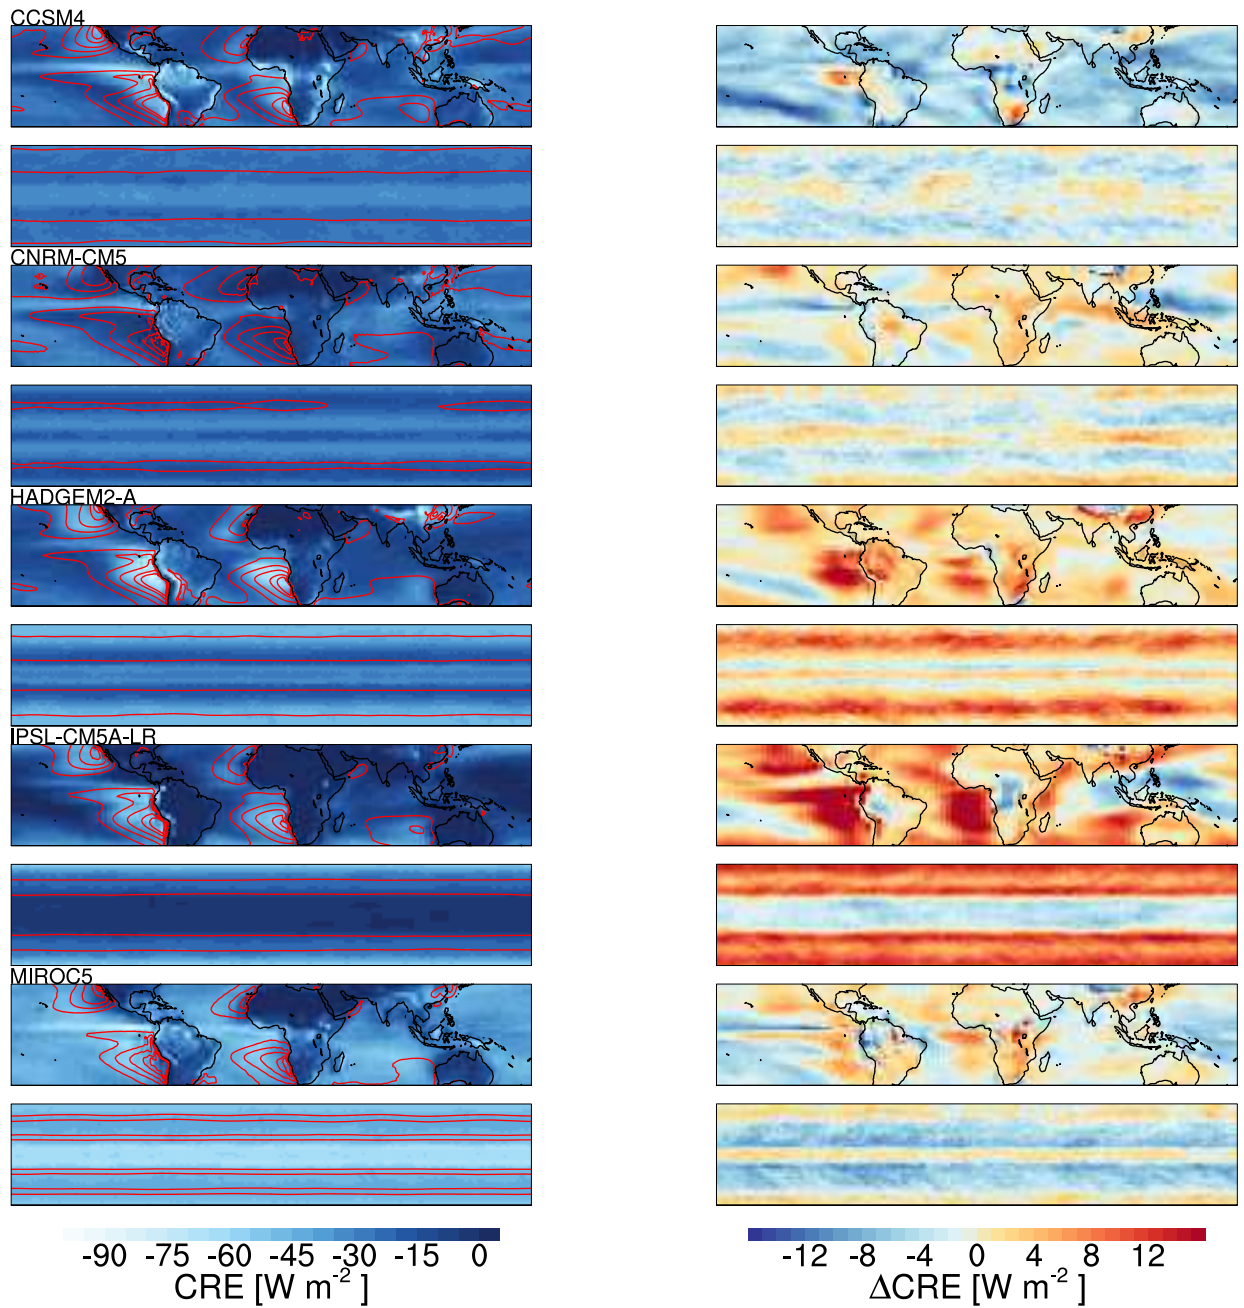

FIGURE 1. As in Fig. 12, but for the models with consistent  $\Delta\text{CRE}$  between AMIP and AQUA SST+4K experiments.
